# Supplementary material for: Strategies to Aid Successful Transition of Adolescents with Congenital Heart Disease: A Systematic Review
Source: MDPI journal article supplement (doi:10.3390/children10030423), 2023-02-22
Supplement: s1 [file s1]

**PRISMA 2020 flow diagram for new systematic reviews which included searches of databases and registers only**

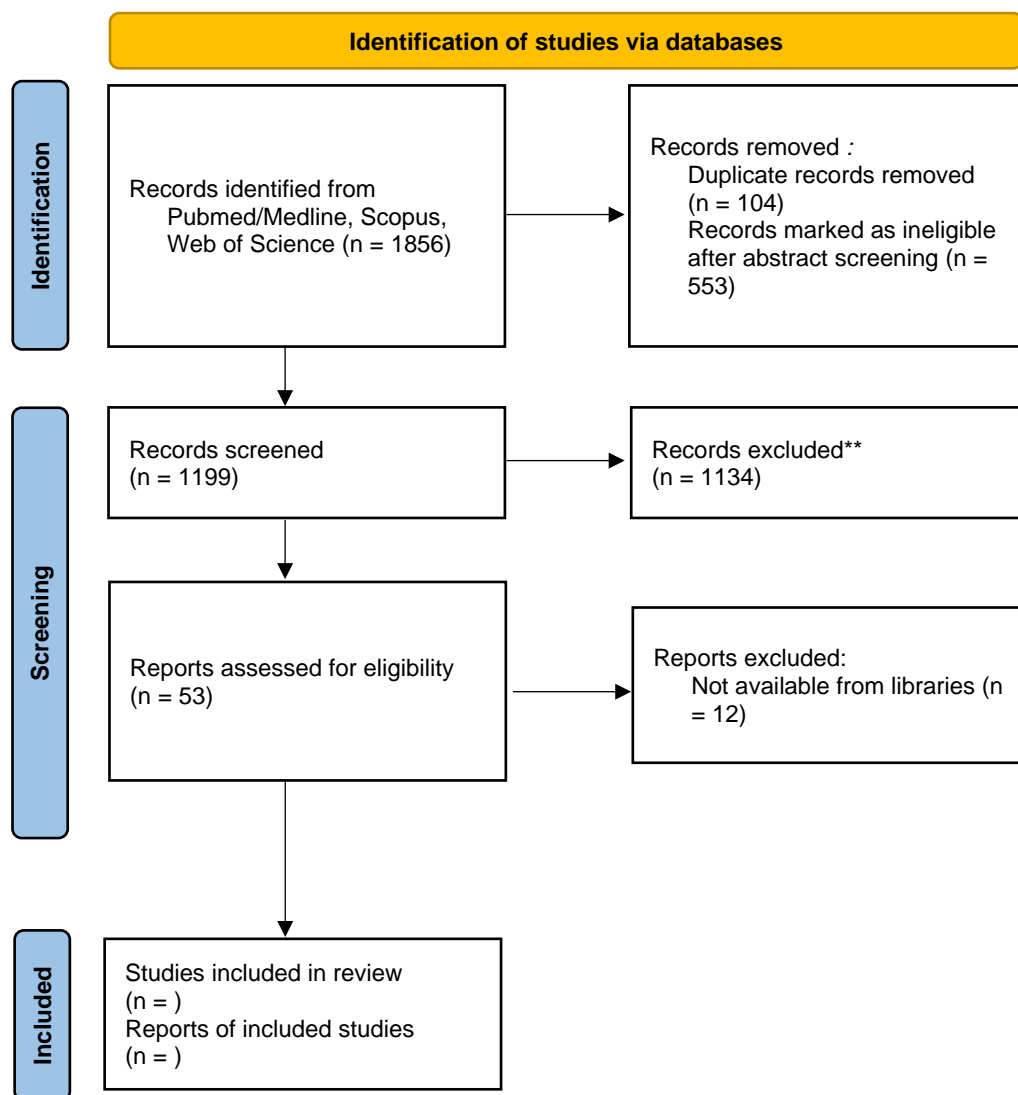

From: Page MJ, McKenzie JE, Bossuyt PM, Boutron I, Hoffmann TC, Mulrow CD, et al. The PRISMA 2020 statement: an updated guideline for reporting systematic reviews. BMJ 2021;372:n71. doi: 10.1136/bmj.n71
